# Supplementary material for: Predicting the Severity of Lockdown-Induced Psychiatric Symptoms with Machine Learning
Source: MDPI journal article supplement (doi:10.3390/diagnostics12040957), 2022-04-12
Supplement: s1 [file s1]

# **Predicting the Severity of Lockdown-induced Psychiatric Symptoms with Machine Learning**

Giordano D’Urso <sup>1</sup>, Alfonso Magliacano <sup>2,\*</sup>, Sayna Rotbei <sup>3</sup>, Felice Iasevoli <sup>1</sup>, Andrea De Bartolomeis <sup>1</sup>, Alessio Botta <sup>3</sup>

<sup>1</sup> *Section of Psychiatry, Department of Neuroscience, Reproductive and Odontostomatological Sciences, University of Naples Federico II, 80131 Napoli, Italy; giordano.durso@unina.it (G.D.); felice.iasevoli@unina.it (F.I.); andrea.debartolomeis@unina.it (A.d.B.)*

<sup>2</sup> *IRCCS Fondazione Don Carlo Gnocchi, 50143 Florence, Italy*

<sup>3</sup> *Department of Electrical Engineering and Information Technology, University of Naples Federico II, 80138 Napoli, Italy; sayna.rotbei@unina.it (S.R.); a.botta@unina.it (A.B.)*

*\* Correspondence: a.magliacano@live.it*

**Supplementary Table S1.** Demographic characteristics of the individuals used for the case study.

| SEX    |      | Education |        |      |            | Family history of OCD |    | Medical comorbidities |    |
|--------|------|-----------|--------|------|------------|-----------------------|----|-----------------------|----|
| Female | Male | Primary   | Middle | High | University | YES                   | NO | YES                   | NO |
| 43     | 51   | 2         | 26     | 43   | 23         | 10                    | 83 | 34                    | 59 |

| Age    |           |        | Financial issues due to lockdown |    | Positive to CoViD-19 |    | Health worker |    |
|--------|-----------|--------|----------------------------------|----|----------------------|----|---------------|----|
| Age<26 | 25<Age<51 | Age>50 | YES                              | NO | YES                  | NO | YES           | NO |
| 15     | 46        | 33     | 6                                | 85 | 15                   | 78 | 4             | 89 |
